# Supplementary material for: Sex and survival in non-small cell lung cancer: A nationwide cohort study
Source: PLOS journal article supplement (doi:10.1371/journal.pone.0219206), 2019-06-27
Supplement: S5 (10.1371/journal.pone.0219206.s005) [file journal.pone.0219206.s005]

**S3 Table. Lung cancer-specific mortality in pulmonary adenocarcinoma diagnosed in 2010-2016, and tested for EGFR.**

|                      |       | n    | %    | HR1 (95% CI)     | HR2 (95% CI)     | HR3 (95% CI)     |
|----------------------|-------|------|------|------------------|------------------|------------------|
| <b>Stage IA-IIIB</b> |       |      |      |                  |                  |                  |
|                      | Men   | 149  | 22.6 | 1.00             | 1.00             | 1.00             |
|                      | Women | 157  | 16.8 | 0.64 [0.51,0.80] | 0.65 [0.50,0.85] | 0.65 [0.50,0.85] |
| <b>Stage IIIA</b>    |       |      |      |                  |                  |                  |
|                      | Men   | 138  | 49.3 | 1.00             | 1.00             | 1.00             |
|                      | Women | 177  | 46   | 0.88 [0.70,1.10] | 0.91 [0.69,1.18] | 0.93 [0.71,1.21] |
| <b>Stage IIIB-IV</b> |       |      |      |                  |                  |                  |
|                      | Men   | 1665 | 73   | 1.00             | 1.00             | 1.00             |
|                      | Women | 2012 | 70   | 0.85 [0.79,0.90] | 0.88 [0.82,0.94] | 0.90 [0.84,0.97] |

Subgroup analysis of numbers (n), percentages (%) of lung cancer deaths and female-to-male hazard ratios (HRs) with 95% confidence intervals (CI) in men and women diagnosed with pulmonary adenocarcinoma in 2010-2016 and tested for EGFR status, by stage group.

HR1: adjusted for age and calendar year of diagnosis. HR2: additionally adjusted for level of education, marital status, birth country, health care region, ECOG performance status, smoking history, Elixhauser comorbidity categories, TNM stage, and primary tumor location. HR3: additionally adjusted for EGFR status.
